# Supplementary material for: A Straightforward Method to Produce Multi-Nanodrug Delivery Systems for Transdermal/Tympanic Patches Using Electrospinning and Electrospray
Source: MDPI journal article supplement (doi:10.3390/polym15173494), 2023-08-22
Supplement: s1 [file s1]

Supplementary

# A Straightforward Method to Produce Multi-Nanodrug Delivery Systems for Transdermal/Tympanic Patches Using Electrospraying and Electrospray

Bahareh Azimi <sup>1,2,\*</sup>, Claudio Ricci <sup>1,2,3</sup>, Teresa Macchi <sup>3</sup>, Cemre Günday <sup>4</sup>, Sara Munafò <sup>1,2</sup>, Homa Maleki <sup>5</sup>, Federico Pratesi <sup>3</sup>, Veronika Tempesti <sup>2</sup>, Caterina Cristallini <sup>2,6</sup>, Luca Bruschini <sup>7</sup>, Andrea Lazzeri <sup>1,2,6</sup>, Serena Danti <sup>1,2,6,\*</sup> and Nazende Günday-Türeli <sup>4,†</sup>

- <sup>1</sup> Department of Civil and Industrial Engineering, University of Pisa, Largo L. Lazzarino 2, 56122 Pisa, Italy; claudio.ricci@unipi.it (C.R.); sara.munafò@gmail.com (S.M.); andrea.lazzeri@unipi.it (A.L.)
  - <sup>2</sup> Consorzio Interuniversitario Nazionale per la Scienza e Tecnologia dei Materiali (INSTM), via G. Giusti 9, 50121 Florence, Italy; v.tempesti@outlook.it (V.T.); caterina.cristallini@cnr.it (C.C.)
  - <sup>3</sup> Department of Translational Researches and New Technologies in Medicine and Surgery, via Savi 10, 56126 Pisa, Italy; teresa.macchi@med.unipi.it (T.M.); federico.pratesi@unipi.it (F.P.)
  - <sup>4</sup> MyBiotech GmbH, Industriestrasse 1B, 66802 Überherrn, Germany; c.guenday@mybiotech.de (C.G.); n.guenday-tuereli@mybiotech.de (N.G.-T.)
  - <sup>5</sup> Department of Carpet, Faculty of Arts, University of Birjand, Birjand 9717434765, Iran; hmaleki@birjand.ac.ir
  - <sup>6</sup> Institute for Chemical and Physical Processes (IPCF), National Council of Researches (CNR), via G. Moruzzi 1, 56124 Pisa, Italy
  - <sup>7</sup> Department of Surgical, Medical, Molecular Pathology and Emergency Medicine, University of Pisa, via Savi 10, 56126 Pisa, Italy; luca.bruschini@unipi.it
- \* Correspondence: bahareh.azimi@ing.unipi.it (B.A.); serena.danti@unipi.it (S.D.)  
 † These authors contributed equally to this work.

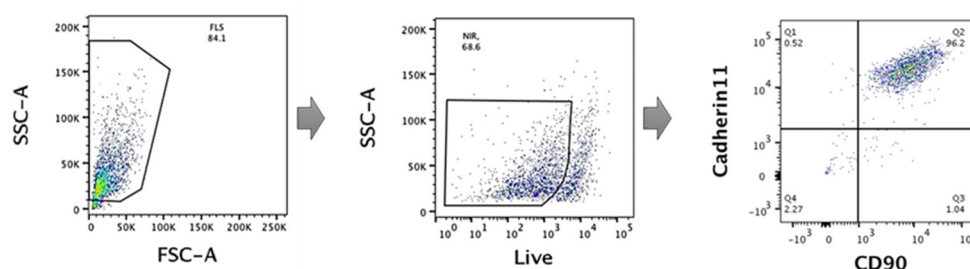

**Figure S1.** Characterization of human dermal fibroblasts (HDFs). HDFs at passage 3 were stained with Anti-CD90/Thy-1 FITC and anti-Cadherin 11 PE. Cell debris were eliminated in the FSC-SSC gating. Dead cells were excluded after staining with Zombie Aqua fixable dye. As per the expression of CD90 and Cadh-11, HDFs are considered pure at >96%.

**Table S1.** Statistical analysis results (*p*-values) for the comparisons between HDFs and the different fiber samples: \* *p* < 0.05; \*\* *p* < 0.001; \*\*\* *p* < 0.0001.

| HDFs<br>versus                        | 2 days | 5 days | 8 days |
|---------------------------------------|--------|--------|--------|
| PHBHV fibers                          | ***    | ***    | ***    |
| PHBHV fibers + PLGA NPs               | ***    | ***    | ***    |
| PHBHV fibers + RHO-loaded<br>PLGA NPs | ***    | ***    | ***    |

---

|                                                          |            |            |            |
|----------------------------------------------------------|------------|------------|------------|
| <b>DEX-loaded PHBHV fibers</b>                           | <b>*</b>   | <b>***</b> | <b>**</b>  |
| <b>DEX-loaded PHBHV fibers +<br/>PLGA NPs</b>            | <b>***</b> | <b>***</b> | <b>***</b> |
| <b>DEX-loaded PHBHV fibers +<br/>RHO-loaded PLGA NPs</b> | <b>***</b> | <b>***</b> | <b>***</b> |

---
